# Supplementary material
Source: publisher figshare collection journal article supplement (https://gsapubs.figshare.com/ndownloader/files/34981741)
Supplement: Supplementary file 1 [file 34981741]

## Sheet: Sr-Nd
Table S5. Summary of whole-rock Sr-Nd isotopic geochemistry data of intrusive rocks in the Beishan
Rock type	Age (Ma)	Data Sources	Latitude(°N)	Longitude(°E)	Sample	Rb (ppm)	Sr (ppm)	87Rb/86Sr	87Sr/86Sr	±2σ
Granite porphyry	217	S. Li et al., 2012	Huaniushan		HNS09823-2.2	205.3	187.5	3.17	0.71939	23
Quartz syenite	221	S. Li et al., 2012	Daquan		B80625-6	112.1	108.7	2.988	0.71716	11
Quartz syenite	221	S. Li et al., 2012	Daquan		DQ09819-4.2	159.2	102.6	4.496	0.71905	15
Syenogranite	221	S. Li et al., 2012	Huaniushan		B70822-4	163.5	73.9	6.409	0.72654	21
Syenogranite	221	S. Li et al., 2012	Huaniushan		B80624-5.1	179.9	187.1	2.785	0.71598	12
Syenogranite	221	S. Li et al., 2012	Changliushui		B80628-3	111.2	207.3	1.553	0.71276	11
Monzogranite	224	S. Li et al., 2012	Baixianishan		MSD09820-4.1	252.1	45.3	16.254	0.79267	16
Syenogranite	224	S. Li et al., 2012	Baixianishan		MSD09821-4.1	173.7	80.3	6.274	0.73601	18
Monzogranite	224	S. Li et al., 2012	Baixianishan		MSD09821-6.1	346.1	27	37.747	0.89268	25
Porphyritic quartz syenite	225	S. Li et al., 2012	Daquan		DQ09819-8	156.5	371.2	1.22	0.71047	19
Porphyritic quartz syenite	225	S. Li et al., 2012	Daquan		DQ09819-9.2	115.3	545.4	0.612	0.70933	25
Quartz monzonite	238	S. Li et al., 2012	Dahuoluo		B70817-2.1	112.6	600.5	0.543	0.70922	16
granodiorite	260	M. Li et al., 2020b	Hazhu		02.31.1	76	288		0.704934
granodiorite	260	M. Li et al., 2020b	Hazhu		02.32.1	79.8	327		0.705054
granodiorite	260	M. Li et al., 2020b	Hazhu		02.32.2	71.5	337		0.705594
granodiorite	260	M. Li et al., 2020b	Hazhu		02.33.2	85.4	358		0.705537
granite	260	W. Zhang, 2013	Jiujing		AB10-122	178	143.7	3.59	0.747923
granite	260	W. Zhang, 2013	Jiujing		AB10-134	94.1	682.9	0.4	0.710605
granite	260	W. Zhang, 2013	Jiujing		AB10-127	87.7	773.5	0.33	0.709436
granite	260	W. Zhang, 2013	Jiujing		AB10-132	110.2	425.6	0.75	0.71085
granite	268.3	R. G. Zheng et al., 2020	Xiaoxigong		15BS47-2	47.5	447	0.307385	0.707016
granite	268.3	R. G. Zheng et al., 2020	Xiaoxigong		15BS47-4	46.5	509	0.264254	0.706772
granite	269	R. G. Zheng et al., 2020	Xiaoxigong		15BS47-6	66.8	488	0.395986	0.707643
granite	269	R. G. Zheng et al., 2020	Xiaoxigong		17DJQ13-5	42.3	455	0.268914	0.706742
granite	269	R. G. Zheng et al., 2020	Xiaoxigong		17DJQ13-6	39.8	466	0.247048	0.706728
granite	269	R. G. Zheng et al., 2020	Xiaoxigong		17DJQ13-7	41	470	0.252332	0.706757
granite	269	W. Zhang, 2013	Jiuquandihongshan		AB10-62	204.6	25.5	23.45	0.806895
granite	269	W. Zhang, 2013	Jiuquandihongshan		AB10 -63	156.5	49.5	9.18	0.724198
monzogranite	270	M. Li et al., 2020b	Hazhu		02.19.2	135	134		0.710659
monzogranite	270	M. Li et al., 2020b	Hazhu		02.24.1	114	204		0.71135
monzogranite	270	M. Li et al., 2020b	Hazhu		02.39.1	96.9	246		0.711324
monzogranite	270	M. Li et al., 2020b	Hazhu		02.40.2	87.4	211		0.711654
dioritic dike	270.2	R. G. Zheng et al., 2020	Yinaoxia		16BS03-6	47.7	202	0.683117	0.707744
dioritic dike	270.2	R. G. Zheng et al., 2020	Yinaoxia		16BS03-7	56.1	205	0.791736	0.708762
dioritic dike	270.2	R. G. Zheng et al., 2020	Yinaoxia		16BS03-8	1.73	292	0.0171392	0.70772
dioritic dike	270.2	R. G. Zheng et al., 2020	Yinaoxia		16BS03-9	10.2	212	0.139192	0.708244
Granite	271	S. C. Xue et al., 2018	Poyi		13PY-7	188	70.8	7.69044	0.737803
Granite	271	S. C. Xue et al., 2018	Poyi		13PY-8	181	78.9	6.64319	0.734464
Granite	271	S. C. Xue et al., 2018	Poyi		13PY-10	203	79.2	7.4325	0.73747
syenogranite	275	S. Li et al., 2013	Wufengshan		B80628-8.2	197.4	51.8	11.075	0.74807	0
mylonitic granodiorite	279	S. Li et al., 2013	Dongdaquan		DDQ09824-2.1	257.3	91.7	8.137	0.73513	10
syenogranite	279	S. Li et al., 2013	Dongdaquan		DDQ09824-1.1	172.2	95	5.252	0.72547	23
silicified diorite	279.7	B. X. Su et al., 2011	Bijiashan		HSS12	25.9	131	0.572	0.712445	6.1e-05
Granite	284.2	This study	Liuyuan		LY1908-79	30.035	206.466	0.43365	0.706786	9.04709e-06
granite	285	W. Zhang, 2013	Bandaoshan		BS07- 329	189.8	46.4	11.92	0.76842
granite	285	W. Zhang, 2013	Bandaoshan		AB09 -98	170	38.4	12.89	0.771452
granite	285	W. Zhang, 2013	Bandaoshan		AB09 -100	211	44	13.96	0.775126
granite	290	W. Zhang, 2013	Yinaoxia		BS07- 75	98.2	185.5	1.53	0.712097
granite	290	W. Zhang, 2013	Yinaoxia		BS07- 76	87.9	139.2	1.83	0.713471
granite	290	W. Zhang, 2013	Yinaoxia		BS07- 79	108.3	109.5	2.87	0.717033
granite	303.7	J. C. Feng et al., 2012	Qiaowan		BS07-16	194.2	448.2	1.255	0.709946	1e-05
granite	303.7	J. C. Feng et al., 2012	Qiaowan		BS07-17	169.2	326.6	1.5	0.711545	1e-05
granite	303.7	J. C. Feng et al., 2012	Qiaowan		BS07-18	153.4	354.1	1.254	0.710333	1.1e-05
granite	304	W. Zhang, 2013	Qiaowan		BS07- 16	194.2	448.2	1.26	0.709946
granite	304	W. Zhang, 2013	Qiaowan		BS07- 17	169.2	326.6	1.5	0.711545
granite	304	W. Zhang, 2013	Qiaowan		BS07- 18	153.4	354.1	1.25	0.710333
granite	313	W. Zhang, 2013	Shuwojing		AB10-70	167.6	33.1	14.75	0.767031
granite	313	W. Zhang, 2013	Shuwojing		AB10-74	143.1	61.1	6.79	0.734667
granite	313	W. Zhang, 2013	Shuwojing		AB10-65	197	42	13.63	0.75952
granite	313	W. Zhang, 2013	Shuwojing		AB10-66	167.8	45.4	10.74	0.753051
granite	328	W. Zhang, 2013	Mingshui		AB09-115	125	259.6	1.39	0.713243
granite	328	W. Zhang, 2013	Mingshui		AB09-116	120.5	344.3	1.01	0.712943
granite	328	W. Zhang, 2013	Mingshui		AB09-118	83	398	0.6	0.71291
granodiorite	334.8	X. C. Sun et al., 2021	Shuangfengshan		SF-1	73.4	238	0.8916	0.7107	7e-06
granodiorite	334.8	X. C. Sun et al., 2021	Shuangfengshan		SF-2	52	285	0.5275	0.7085	8e-06
granodiorite	334.8	X. C. Sun et al., 2021	Shuangfengshan		SF-3	63.5	283	0.6487	0.7098	7e-06
granodiorite	334.8	X. C. Sun et al., 2021	Shuangfengshan		SF-4	67.4	232	0.8399	0.7104	1.1e-05
granodiorite	334.8	X. C. Sun et al., 2021	Shuangfengshan		SF-5	41	370	0.3204	0.7082	8e-06
granite	355	Y. Q. Yang et al., 2013	Dongqiyishan		DQ1-1	114.2	150.6	2.195	0.71558
granite	355	Y. Q. Yang et al., 2013	Dongqiyishan		DQ1-2	105.6	141.3	2.165	0.716
granite	355	Y. Q. Yang et al., 2013	Dongqiyishan		DQ1-3	120.9	158.2	2.214	0.716
granite	355	Y. Q. Yang et al., 2013	Dongqiyishan		DQ1-5	106.5	212.9	1.449	0.7135
granite	355	Y. Q. Yang et al., 2013	Dongqiyishan		DQ4-4	572.4	150.7	1.099	0.7104
granite	355	Y. Q. Yang et al., 2013	Dongqiyishan		DQ4-5	896.2	140.2	1.85	0.7121
granite	355	Y. Q. Yang et al., 2013	Dongqiyishan		DQ4-6	772.3	126.6	1.766	0.7122
granite	355	Y. Q. Yang et al., 2013	Dongqiyishan		DQ4-7	647.6	154.1	1.216	0.7122
granite	355	Y. Q. Yang et al., 2013	Dongqiyishan		DQ4-8	737.1	147.9	1.442	0.7119
granite	356	W. Zhang, 2013	Dongqiyishan		W08- 295	29.8	623.9	0.14	0.706504
granite	356	W. Zhang, 2013	Dongqiyishan		W08- 294	77.3	268.4	0.83	0.71171
granite	356	W. Zhang, 2013	Dongqiyishan		W08- 298	39.6	505.3	0.23	0.708159
granite	359	Y. Q. Yang et al., 2013	Dongqiyishan		DQ2-1	663.4	333.3	0.576	0.7084
granite	359	Y. Q. Yang et al., 2013	Dongqiyishan		DQ2-3	835.6	306.6	0.7887	0.7093
granite	359	Y. Q. Yang et al., 2013	Dongqiyishan		DQ2-4	740.9	362.1	0.592	0.7084
granite	359	Y. Q. Yang et al., 2013	Dongqiyishan		DQ2-5	739	367.4	0.5819	0.7085
Bt-granite	362.6	X. Y. Wang et al., 2018b	Shibanjing		12SB08	72	353	0.5906	0.71005	7e-06
Bt-granite	362.6	X. Y. Wang et al., 2018b	Shibanjing		12SB09	72.1	343	0.6097	0.710218	7e-06
Bt-granite	362.6	X. Y. Wang et al., 2018b	Shibanjing		12SB10	73.5	349	0.6113	0.710161	7e-06
Bt-granodiorite	363.4	X. Y. Wang et al., 2018b	Jianshan		12SB02	30.4	599	0.147	0.706505	6e-06
Bt-granodiorite	363.4	X. Y. Wang et al., 2018b	Jianshan		12SB03	39.6	618	0.1856	0.706788	6e-06
Bt-granodiorite	363.4	X. Y. Wang et al., 2018b	Jianshan		12SB04	33.3	669	0.1444	0.706421	6e-06
Bt-granodiorite	363.4	X. Y. Wang et al., 2018b	Jianshan		12SB05	29.8	624	0.1384	0.706411	7e-06
granite	365	W. Zhang, 2013	Sandaomingshui		AB10-93	24.1	345.2	0.2	0.706594
granite	365	W. Zhang, 2013	Sandaomingshui		AB10-100	34.3	141.5	0.7	0.709492
granite	374	Q. G. Mao et al., 2012a	Liuyuan		08L01	60.2	370	0.4708	0.70879	1.2e-05
granite	374	Q. G. Mao et al., 2012a	Liuyuan		08L06	38.2	458	0.2414	0.707266	1e-05
granite	374	Q. G. Mao et al., 2012a	Liuyuan		08L12	30.4	321	0.2734	0.707962	1.8e-05
granite	374	Q. G. Mao et al., 2012a	Liuyuan		08L14	49.3	334	0.4278	0.708107	1.6e-05
granite	374	Q. G. Mao et al., 2012a	Liuyuan		08LY03-02	63.3	358	0.5122	0.708642	1.8e-05
granite	374	Q. G. Mao et al., 2012a	Liuyuan		08LY03-06	68.9	458	0.4357	0.708677	9e-06
granite	395	X. Y. Wang et al., 2018a	Gongpoquan		X1MZ143
K-feldspar granite	397	S. Li et al., 2011	Huitongshan		B80626-5.1	245.8	68.2	10.487	0.76732	11
K-feldspar granite	397	S. Li et al., 2011	Huitongshan		B70823-6	455.3	19.3	70.685	1.04794	11
K-feldspar granite	397	S. Li et al., 2011	Huitongshan		B70823-8	223.5	41.7	15.631	0.78484	11
K-feldspar granite	400	Z. H. Zhao et al., 2007	Liuyuan		LY-3-24	177.7	55.44	9.27444	0.731399	15
monzogranite	400	Z. H. Zhao et al., 2007	Liuyuan		LY-2-55	247.7	47.48	15.0952	0.77228	16
monzogranite	400	Z. H. Zhao et al., 2007	Liuyuan		LY-6-18	173.8	176.3	2.85247	0.725608	16
Monzogranite	402.3	This study	Liuyuan		LJ2020-23	83.8106	296.674	0.842133	0.71241	8.38857e-06
granite	403	W. Zhang, 2013	Gongpoquan		BS07- 136	114.4	91	3.65	0.727459
granite	403	W. Zhang, 2013	Gongpoquan		BS07- 138	24.2	854	0.08	0.705003
granite	403	W. Zhang, 2013	Gongpoquan		BS07- 140	302.1	13.5	67.27	1.06322
biotite monzogranite	404	J. Zhu et al., 2016	Shijinpo		SJP-2γ-3	200.5	177.3	3.278	0.726949	9
biotite monzogranite	404	J. Zhu et al., 2016	Shijinpo		SJP-2γ-4	173.4	184.6	2.723	0.725068	8
Monzogranite	406.6	This study	Liuyuan		LJ2020-47	95.5962	83.2951	3.42124	0.729439	8.43266e-06
granite	409.4	X. Y. Wang et al., 2018a	Gongpoquan		X1MZ135	196.7	139.1		0.739115
granite	409.4	X. Y. Wang et al., 2018a	Gongpoquan		X1MZ136	187.1	132.9		0.737671
syenogranite	415	S. Li et al., 2009	Shuangfengsahn		B80624-7.1	297.73	24.44	35.9242	0.90075	12
syenogranite	415	S. Li et al., 2009	Shuangfengsahn		B80624-9.1	234.13	81.43	8.359	0.75309	11
syenogranite	419	J. Zhu et al., 2016	Huitongshan		HTS-YT-3	248.7	82.3	8.76	0.749761	8
syenogranite	419	J. Zhu et al., 2016	Huitongshan		HTS-YT-4	247.2	84.4	8.491	0.751011	5
syenogranite	419	J. Zhu et al., 2016	Huitongshan		HTS-YT-6	246	84.4	8.45	0.750577	6
granite	420	Q. G. Mao et al., 2012a	Liuyuan		LYB19-2	67.4	604.9	0.3225	0.708292	1.5e-05
granodiorite	420	S. Li et al., 2011	Shijinpo		B70823-2	135.2	106.4	3.684	0.72715	18
Granite	421	This study	Liuyuan		LJ2020-38	170.49	197.963	2.56729	0.726327	9.51727e-06
Granite	421	This study	Liuyuan		LY1908-1	85.5304	260.658	0.978163	0.718074	9.22099e-06
granite	426	W. Zhang, 2013	Tongchangkou		BS07-123	155.7	233.6	1.93	0.718315
granite	426	W. Zhang, 2013	Tongchangkou		AB10-80	113.4	194	1.69	0.71708
granodiorite	430	Z. H. Zhao et al., 2007	Liuyuan		LY-12-17	79.59	1016.5	0.226555	0.707709	14
granodiorite	434.4	R. G. Zheng et al., 2018	Mazongshan		BA11-115	49.26	515.1	0.2768	0.707228	1.1e-05
granodiorite	434.4	R. G. Zheng et al., 2018	Mazongshan		BA11-118	19.57	682.2	0.083	0.706108	1.5e-05
granodiorite	434.4	R. G. Zheng et al., 2018	Mazongshan		BA11-119	12.04	828	0.0421	0.706106	1.5e-05
granite	436	X. F. Li et al., 2015	Mingshujing		XJ11-137	98.35	457.3	0.622386	0.710061	1.9e-05
Diorite	436.1	This study	Liuyuan		LJ2020-46	91.6287	678.842	0.402369	0.70934	8.23688e-06
diorite	437	X. F. Li et al., 2015	Mingshujing		XJ11-138	86.36	780.2	0.320265	0.708165	1.4e-05
diorite	437	X. F. Li et al., 2015	Mingshujing		XJ11-142	102.3	614.4	0.481955	0.708951	1.7e-05
K-feldspar granite	440	Z. H. Zhao et al., 2007	Liuyuan		LY-2-61	205.9	112.3	5.30518	0.737734	17
K-feldspar granite	440	Z. H. Zhao et al., 2007	Liuyuan		LY-6-27	265.7	36.6	21.0055	0.787563	17
pyroxene diorite	449	X. F. Li et al., 2015	Mingshujing		XJ11-150	94.86	668.7	0.410495	0.708802	1.4e-05
granodiorite	450	Z. H. Zhao et al., 2007	Liuyuan		LY-3-4	121.9	305.2	1.15569	0.713903	15
Bt-monzogranite	451.4	This study	Liuyuan		LJ2020-25	109.498	476.349	0.685243	0.714234	7.42121e-06
plagioclase granite	536	Q. Y. Hou et al., 2012	Yueyashan ophiolite		HBS5309	4.78	270	0.051	0.70369	3e-05
TTG gneiss	2642	K. Q. Zong et al., 2013	Dunhuang		X11-114-1	40.6	458	0.2565	0.720769	4e-06
TTG gneiss	2708	K. Q. Zong et al., 2013	Dunhuang		X11-122-1	35.5	574	0.1789	0.716436	4e-06
TTG gneiss	2717	K. Q. Zong et al., 2013	Dunhuang		X11-113-2	52.6	445	0.3418	0.721253	4e-06
rhyolite	272.7	W. Xu et al., 2018	40. 55 °	98. 65°	14YJZ-H1			6.7985	0.748692
rhyolite	279.1	B. X. Su et al., 2011	Bijiashan		HSS6-1	42.3	73.9	1.66	0.713204	0.0001
rhyolite	279.1	B. X. Su et al., 2011	Bijiashan		HSS6-2	39.1	67.2	1.68	0.713221	4.7e-05
rhyolite	279.1	B. X. Su et al., 2011	Bijiashan		HSS6-3	39.2	55.3	2.05	0.714581	3.1e-05
rhyolite	279.1	B. X. Su et al., 2011	Bijiashan		HSS6-4	358	671	1.54	0.712693	4.8e-05
rhyolite	291.1	W. Xu et al., 2018	41. 04°	97. 40°	14SHJ-H1			9.416	0.749786
rhyolite	291.1	W. Xu et al., 2018	41. 04°	97. 40°	14SHJ-H2			15.371	0.770426
rhyolite	291.1	W. Xu et al., 2018	41. 04°	97. 40°	14SHJ-H3			7.269	0.743065
rhyolite	294.7	W. Xu et al., 2018	40. 81°	99. 74°	14SHSS-H2			23.559	0.801029
rhyolite	294.7	W. Xu et al., 2018	40. 81°	99. 74°	14SHSS-H4			20.111
rhyolite	294.7	W. Xu et al., 2018	40. 81°	99. 74°	14SHSS-H5			14.908	0.77023
rhyolite	370	Q. Q. Guo et al., 2017	Dundunshan		09DDS03	147.8	263.5	1.625	0.71932	15
rhyolite	370	Q. Q. Guo et al., 2017	Dundunshan		09DDS03-2	108.5	269.4	1.167	0.71604	14
rhyolite	370	Q. Q. Guo et al., 2017	Dundunshan		09DDS49-3	221	70.2	9.149	0.75513	13
rhyolite	370	Q. Q. Guo et al., 2017	Dundunshan		09DDS41-1	198.1	60	9.596	0.75417	13
rhyolite	370	Q. Q. Guo et al., 2017	Dundunshan		09DDS45-1	215.2	65.5	9.554	0.75769	11
andesite	415.3	R. G. Zheng et al., 2019	Xiaohuangshan		BA11-57	23.43	442.8	0.1531	0.705487	1.2e-05
andesite	415.3	R. G. Zheng et al., 2019	Xiaohuangshan		BA11-61	12.35	508.5	0.0703	0.705611	1.3e-05
andesite	415.3	R. G. Zheng et al., 2019	Xiaohuangshan		BA11-62	20.59	458.5	0.1339	0.705118	1.1e-05
andesite	420.5	R. G. Zheng et al., 2019	Xiaohuangshan		BA11-60	23.23	420.84	0.1646	0.706832	7e-06
andesite	427.6	R. G. Zheng et al., 2019	Xiaohuangshan		BS19-1	18.1	471	0.1146	0.705797	6e-06
andesite	427.6	R. G. Zheng et al., 2019	Xiaohuangshan		BS19-2	25	452	0.1649	0.705875	8e-06
andesite	431.2	R. G. Zheng et al., 2019	Xiaohuangshan		BS44-1	37.7	632	0.1778	0.705309	7e-06
dacite	440	Q. G. Mao et al., 2012a	Liuyuan		08LY01-01	89.1	179	1.4366	0.716863	1.1e-05
ultramafic	230	Y. Y. Zhang et al., 2011	Liuyuan		LY9-18-1	224.3	3264.2	0.2	0.71	14
ultramafic	230	Y. Y. Zhang et al., 2011	Liuyuan		LY9-19-1	233.4	3539	0.19	0.71	14
ultramafic	230	Y. Y. Zhang et al., 2011	Liuyuan		LY9-19-2	230.8	2634.5	0.25	0.71	17
ultramafic	250	Y. Y. Zhang et al., 2011	Liuyuan		LY-11-3	6.41	78.47	0.24	0.71	16
ultramafic	250	Y. Y. Zhang et al., 2011	Liuyuan		LY-11-7	2.05	51.44	0.12	0.71	16
gabbro	260	R. G. Zheng et al., 2014	Yinaoxia		Y-6	41.4	345.8	0.3612	0.709434	1.1e-05
gabbro	260	R. G. Zheng et al., 2014	Yinaoxia		Y-7	20.5	568	0.1018	0.707188	1.5e-05
gabbro	260	R. G. Zheng et al., 2014	Yinaoxia		Y-5	11.4	407.3	0.0824	0.70811	1.5e-05
gabbro	260	R. G. Zheng et al., 2014	Yinaoxia		Y-2	71.3	336.1	0.6137	0.709193	1.2e-05
gabbro	260	R. G. Zheng et al., 2014	Yinaoxia		Y-1	3.51	231.2	0.0462	0.707304	1.1e-05
Dolerite	270.1	S. C. Xue et al., 2018	Poyi		PY23-1	9.37	233	0.1167	0.705512
Dolerite	270.1	S. C. Xue et al., 2018	Poyi		PY23-2	10.6	344	0.0883	0.706265
mafic dike	271.5	R. G. Zheng et al., 2020	Yinaoxia		16BS03-1	30.5	352	0.250652	0.707404
mafic dike	271.5	R. G. Zheng et al., 2020	Yinaoxia		16BS03-2	39.9	407	0.283601	0.707786
mafic dike	271.5	R. G. Zheng et al., 2020	Yinaoxia		16BS03-3	35.5	359	0.286048	0.707217
mafic dike	271.5	R. G. Zheng et al., 2020	Yinaoxia		16BS03-4	28.1	330	0.246319	0.707237
olivine gabbro	280	Q. G. Mao et al., 2012b	Liuyuan		LYB17-4	40.28	314.3	0.3709	0.711303	1.3e-05
olivine gabbro	280	Q. G. Mao et al., 2012b	Liuyuan		LYB18-4	27.56	238.6	0.3343	0.710145	1.4e-05
massive gabbro	280	Q. G. Mao et al., 2012b	Liuyuan		9LY04-1	7.7	330	0.0675	0.705922	1.4e-05
hornblende gabbro	280	Q. G. Mao et al., 2012b	Liuyuan		DQ43-8	11.53	176.1	0.1895	0.704105	1.1e-05
doleritic dike	282	Y. Y. Zhang et al., 2015	Yinaoxia		XIMZ179	49.2	144	0.9861	0.707929	1.3e-05
doleritic dike	282	Y. Y. Zhang et al., 2015	Yinaoxia		XIMZ186	31.4	169	0.5365	0.705683	1.2e-05
doleritic dike	282	Y. Y. Zhang et al., 2015	Gubaoquan		XIGB35	2.9	160	0.0524	0.705026	1.3e-05
doleritic dike	282	Y. Y. Zhang et al., 2015	Gubaoquan		XIGB38	4.03	202	0.0577	0.705803	1.3e-05
doleritic dike	282	Y. Y. Zhang et al., 2015	Gubaoquan		XIGB44	17.9	258	0.2011	0.706339	1.5e-05
doleritic dike	282	Y. Y. Zhang et al., 2015	Gubaoquan		XIGB09	34.6	182	0.5497	0.714826	1e-05
doleritic dike	282	Y. Y. Zhang et al., 2015	Gubaoquan		XIGB12	40.3	137	0.8527	0.707002	1.5e-05
doleritic dike	285	W. B. Gao et al., 2020	Gubaoquan		GBQ-01b	34.8	137	0.7375	0.710174
doleritic dike	285	W. B. Gao et al., 2020	Gubaoquan		GBQ-05a	38.1	170	0.6466	0.710168
doleritic dike	285	W. B. Gao et al., 2020	Gubaoquan		GBQ-06a	43.8	157	0.8076	0.710901
doleritic dike	285	W. B. Gao et al., 2020	Gubaoquan		GBQ-07a	29.2	151	0.5612	0.708516
doleritic dike	285	W. B. Gao et al., 2020	Gubaoquan		GBQ-09a	36.9	160	0.6678	0.709702
gabbro	290	Y. Y. Zhang et al., 2011	Liuyuan		LY-2-6	103	270.3	1.1	0.71	14
gabbro	290	Y. Y. Zhang et al., 2011	Liuyuan		LY-2-27	12.47	245.3	0.15	0.71	16
gabbro	290	Y. Y. Zhang et al., 2011	Liuyuan		LY-8-11	20.31	155.9	0.38	0.7	16
gabbro	290	Y. Y. Zhang et al., 2011	Liuyuan		LY-8-13	11.82	233.6	0.15	0.7	14
gabbro	290	Y. Y. Zhang et al., 2011	Liuyuan		LY-8-19	6.99	145.5	0.14	0.7	15
gabbro	290	Y. Y. Zhang et al., 2011	Liuyuan		LY15-3	0.33	382.4	0	0.71	13
gabbro	290	Y. Y. Zhang et al., 2011	Liuyuan		LY15-4	0.98	151.6	0.02	0.7	13
gabbro	290	Y. Y. Zhang et al., 2011	Liuyuan		LY15-6	1.96	136.4	0.04	0.7	12
gabbro	344.6	W. C. Niu et al., 2020	Baiheshan		YQ1059-1				0.705454
gabbro	344.6	W. C. Niu et al., 2020	Baiheshan		YQ5004- 1				0.704502
gabbro	344.6	W. C. Niu et al., 2020	Baiheshan		YQ6208-1				0.708445
gabbro	344.6	W. C. Niu et al., 2020	Baiheshan		YQ2005-3				0.704703
gabbro	344.6	W. C. Niu et al., 2020	Baiheshan		PM01YQ46-1				0.704661
gabbro	344.6	W. C. Niu et al., 2020	Baiheshan		PM01YQ37-1b				0.704697
gabbro	344.6	W. C. Niu et al., 2020	Baiheshan		PM01YQ39-1				0.704527
olivine gabbro	366	J. P. Yu et al., 2021	Tanshanzi		B505	4.11	276.13	0.043	0.705	9e-06
olivine gabbro	366	J. P. Yu et al., 2021	Tanshanzi		B506	3.23	292.22	0.032	0.7051	8e-06
olivine gabbro	366	J. P. Yu et al., 2021	Tanshanzi		B507	6.71	321.41	0.0604	0.7052	9e-06
granite	415	S. Li et al., 2009	Shuangfengsahn		SF07	247.9	24.4	29.842	0.86424	16
gabbro	443	X. F. Li et al., 2015	Mingshujing		XJ11-139	42.27	837.2	0.146057	0.706814	1.3e-05
Gabbro	516	Y. R. Shi et al., 2018	Xiaohuangshan		XHS10	3.49	174	0.06	0.705611	1.4e-05
Gabbro	521	Y. R. Shi et al., 2018	Yushishan		YYSS02-2	2.88	418	0.02	0.703182	1.5e-05
Gabbro	528	Y. R. Shi et al., 2018	Hongliuhe		HLH14-1	5.18	132	0.11	0.705951	1.4e-05
Pegamtoid gabbro	535	Y. R. Shi et al., 2018	Xichangjing		XCJ04-3	0.58	57	0.03	0.704863	1.4e-05
gabbro	536	Q. Y. Hou et al., 2012	Yueyashan ophiolite		HBS5302	0.1	4	0.07	0.70474	4e-05
peridotite	536	Q. Y. Hou et al., 2012	Yueyashan ophiolite		HBS5303	0.08	6	0.039	0.71281	2e-05
peridotite	536	Q. Y. Hou et al., 2012	Yueyashan ophiolite		HBS5304	0.11	7	0.049	0.71094	9e-05
pyroxenite	536	Q. Y. Hou et al., 2012	Yueyashan ophiolite		HBS5305	0.54	18	0.086	0.70426	7e-05
peridotite	536	Q. Y. Hou et al., 2012	Yueyashan ophiolite		HBS5306	0.09	7	0.04	0.71125	8e-05
gabbro	536	Q. Y. Hou et al., 2012	Yueyashan ophiolite		HBS5308	0.22	10	0.062	0.70666	7e-05
peridotite	536	Q. Y. Hou et al., 2012	Yueyashan ophiolite		HBS5312	0.09	5	0.051	0.71058	4e-05
eclogite	881	J. F. Qu et al., 2011	Gubaoquan		LHY02
eclogite	881	J. F. Qu et al., 2011	Gubaoquan		LHY03
eclogite	881	J. F. Qu et al., 2011	Gubaoquan		GBQOl
eclogite	881	J. F. Qu et al., 2011	Gubaoquan		GBQ02
eclogite	881	J. F. Qu et al., 2011	Gubaoquan		GBQ12
eclogite	881	J. F. Qu et al., 2011	Gubaoquan		GBQ15
eclogite	881	J. F. Qu et al., 2011	Gubaoquan		GBQ20
amphibolite	889	J. Soldner et al., 2020a	Liuyuan		16JS59	45.3	107		0.733404
eclogite	889	J. Soldner et al., 2020a	Liuyuan		16JS79-I	5.13	130		0.707
eclogite	889	J. Soldner et al., 2020a	Liuyuan		16JS79-II	30.4	107		0.717244
eclogite	889	J. Soldner et al., 2020a	Liuyuan		16JS79-IV	7.37	105		0.712915
eclogite	889	J. Soldner et al., 2020a	Liuyuan		16JS84	12.9	120		0.712614
eclogite	889	J. Soldner et al., 2020a	Liuyuan		XIGB04	13.6	513		0.708512
amphibolite	1378	J. Soldner et al., 2020a	Liuyuan		16JS98	60.8	200		0.731701
basalt	280	Q. G. Mao et al., 2012b	Liuyuan		9LY03-2	11.43	238	0.1389	0.704216	1.3e-05
basalt	280	Q. G. Mao et al., 2012b	Liuyuan		DQ42-6	30.02	154.6	0.5616	0.705955	1.5e-05
basalt	280	Q. G. Mao et al., 2012b	Liuyuan		DQ53-3	8.09	144.7	0.1617	0.704589	1.2e-05
basalt	280	Q. G. Mao et al., 2012b	Liuyuan		LY01	17.28	197.9	0.2525	0.704911	1.3e-05
basalt	280	Q. G. Mao et al., 2012b	Liuyuan		9LY05-3
basalt	280	Q. G. Mao et al., 2012b	Liuyuan		9LY05-5	4.12	148.9	0.0801	0.704531	1.2e-05
basalt	280	Q. G. Mao et al., 2012b	Liuyuan		DQ52-5	6.36	211.2	0.0871	0.704197	1.3e-05
basalt	280	Q. G. Mao et al., 2012b	Liuyuan		DQ40-5	0.51	113.6	0.0129	0.704287	1e-05
basalt	280	Q. G. Mao et al., 2012b	Liuyuan		DQ41-5	5.5	204.3	0.0778	0.70405	1.3e-05
basalt	280	Q. G. Mao et al., 2012b	Liuyuan		DQ44-6	20.89	213.9	0.2826	0.705416	1.4e-05
basalt	280	Q. G. Mao et al., 2012b	Liuyuan		DQ44-8	8.75	207.1	0.1222	0.704531	1e-05
basalt	280	Q. G. Mao et al., 2012b	Liuyuan		DQ45-4	3.2	138.3	0.0669	0.704594	1.2e-05
basalt	280	R. G. Zheng et al., 2014	Yinaoxia		Y-8	13.4	204.3	0.1895	0.704475	1.2e-05
basalt	280	R. G. Zheng et al., 2014	Yinaoxia		Y-9	17.2	265.6	0.1874	0.706015	1.3e-05
basalt	280	R. G. Zheng et al., 2014	Yinaoxia		Y-10	9.75	189.8	0.1487	0.704405	1.5e-05
basalt	280	R. G. Zheng et al., 2014	Yinaoxia		Y-11	10.4	198.4	0.1516	0.704556	1.4e-05
basalt	280	R. G. Zheng et al., 2014	Yinaoxia		Y-12	16.4	196.5	0.2422	0.704718	1.3e-05
basalt	280	Y. Y. Zhang et al., 2011	Liuyuan		LY-1-33	5.67	175.4	0.09	0.7	15
basalt	280	Y. Y. Zhang et al., 2011	Liuyuan		LY-5-11	10.38	177.9	0.17	0.7	18
basalt	280	Y. Y. Zhang et al., 2011	Liuyuan		05LY18-1	6.78	263.7	0.07	0.7	11
basalt	280	Y. Y. Zhang et al., 2011	Liuyuan		05LY18-2	8.17	306.8	0.08	0.7	12
basalt	280	Y. Y. Zhang et al., 2011	Liuyuan		05LY18-5	18.84	292	0.19	0.7	14
basalt	280	Y. Y. Zhang et al., 2011	Liuyuan		05LY18-7	14.22	107	0.38	0.71	14
basalt	280	Y. Y. Zhang et al., 2011	Liuyuan		05LY18-8	10.26	187.8	0.16	0.7	13
basalt	280	Y. Y. Zhang et al., 2011	Liuyuan		05LY18-9	10.19	185.2	0.16	0.7	12
basalt	280	Y. Y. Zhang et al., 2011	Liuyuan		05LY18-10	16.65	160.1	0.3	0.71	14
basalt	280	Y. Y. Zhang et al., 2011	Liuyuan		05LY18-11	4.79	156.8	0.09	0.7	14
basalt	280	Y. Y. Zhang et al., 2011	Liuyuan		05LY18-12	13.24	200.6	0.19	0.71	13
basalt	280	Y. Y. Zhang et al., 2011	Liuyuan		05LY18-13	13.46	216.1	0.18	0.7	12
basalt	280	Y. Y. Zhang et al., 2011	Liuyuan		05LY18-14	17.25	274.4	0.18	0.71	14
basalt	280	Y. Y. Zhang et al., 2011	Liuyuan		05LY18-15	13.31	273.4	0.14	0.71	13
basalt	280	Y. Y. Zhang et al., 2011	Liuyuan		05LY18-16	4.22	254.9	0.05	0.71	14
basalt	280	Y. Y. Zhang et al., 2011	Liuyuan		05LY18-17	16.84	179	0.27	0.71	10
basalt	280	Y. Y. Zhang et al., 2011	Liuyuan		05LY18-19	11.66	201	0.17	0.71	11
basalt	280	Y. Y. Zhang et al., 2011	Liuyuan		05LY18-20	11.71	188.5	0.18	0.7	11
basalt	280	Y. Y. Zhang et al., 2011	Liuyuan		05LY18-22	4.89	205	0.07	0.71	11
basalt	280	Y. Y. Zhang et al., 2011	Liuyuan		05LY18-23	4.24	148.9	0.08	0.71	12
basalt	280	Y. Y. Zhang et al., 2011	Liuyuan		05LY18-24	7.34	195.5	0.11	0.71	12
basalt	280	Y. Y. Zhang et al., 2011	Liuyuan		05LY18-25	20.84	317.4	0.19	0.71	12
basalt	289.5	W. Xu et al., 2019a	41.04 °	97.56°	16HHQ-H11	11.8	445	0.0767	0.705961	7e-06
basalt	289.5	W. Xu et al., 2019a	41.04 °	97.56°	16HHQ-H13	9.5	546	0.0505	0.70617	8e-06
basalt	289.5	W. Xu et al., 2019a	41.04 °	97.56°	16HHQ-H18	4.6	285	0.0432	0.706488	7e-06
basalt	289.5	W. Xu et al., 2019a	41.04 °	97.56°	16HHQ-H5	21.2	184	0.3331	0.708657	6e-06
basalt	411.2	R. G. Zheng et al., 2019	Xiaohuangshan		BS17-1	0.79	564	0.0042	0.70504	6e-06
basalt	411.2	R. G. Zheng et al., 2019	Xiaohuangshan		BS17-2	15.6	409	0.1137	0.705545	7e-06
basalt	411.2	R. G. Zheng et al., 2019	Xiaohuangshan		BS17-3	8.08	506	0.0476	0.705367	7e-06
basalt	431.2	R. G. Zheng et al., 2019	Xiaohuangshan		BS20-1	37.7	632	0.1778	0.71239	8e-06
basalt	431.2	R. G. Zheng et al., 2019	Xiaohuangshan		BS20-3	46	588	0.2332	0.712676	7e-06
basalt	434.3	R. G. Zheng et al., 2019	Xiaohuangshan		BS20-4	33.8	619	0.1628	0.712316	8e-06
basalt	450	Q. G. Mao et al., 2012a	Liuyuan		08LY02-01	48.8	564	0.2504	0.707764	1e-05
basalt	450	Q. G. Mao et al., 2012a	Liuyuan		08LY02-08	34.1	274	0.3596	0.709209	9.5e-05
basalt	450	Q. G. Mao et al., 2012a	Liuyuan		HNS02-1	41.2	468.9	0.254	0.707187	1.4e-05
basalt	536	Q. Y. Hou et al., 2012	Yueyashan ophiolite		HBS5310	7.59	1393	0.016	0.70304	1e-05
basalt	536	Q. Y. Hou et al., 2012	Yueyashan ophiolite		HBS5311	1.39	324	0.012	0.70371	2e-05
Sm (ppm)	Nd (ppm)	147Sm/144Nd	143Nd/144Nd	±2σ	(87Sr/86Sr) i	(143Nd/144Nd) i	εNd(t)	εNd(0)	TDM(Nd) (Ga)	T2DM
10.43	68.85	0.0916	0.512413	5	0.7096		-1.5	-4.4	0.92	1.11
20.1	119.38	0.1018	0.512433	12	0.7078		-1.3	-4	0.98	1.11
12.14	66.11	0.111	0.512437	10	0.7049		-1.5	-3.9	1.06	1.12
6.62	45.98	0.0871	0.512405	7	0.7064		-1.5	-4.5	0.9	1.12
5.34	37.33	0.0866	0.512389	11	0.7072		-1.8	-4.9	0.91	1.14
16.32	95.39	0.1034	0.512394	11	0.7079		-2.1	-4.8	1.04	1.17
3.95	19.73	0.1213	0.512471	7	0.7409		-1.1	-3.3	1.12	1.09
10.65	59.85	0.1076	0.512365	10	0.716		-2.8	-5.3	1.13	1.23
4.11	21.58	0.1152	0.512475	9	0.7724		-0.9	-3.2	1.04	1.07
7.28	46.8	0.0941	0.512411	6	0.7066		-1.5	-4.4	0.94	1.12
14.04	102.12	0.0832	0.512391	5	0.7074		-1.6	-4.8	0.89	1.13
6.78	39.09	0.1049	0.51244	5	0.7074		-1.1	-3.9	0.99	1.1
2.8	15		0.512775		0.702111	0.512574	5.29		0.600501	0.6
2.57	16		0.512768		0.702443	0.512595	5.7		0.52189	0.567
2.74	12.5		0.512763		0.703324	0.512527	4.37		0.789213	0.675
2.72	13.9		0.512758		0.702985	0.512547	4.77		0.667338	0.643
1.81	6.4	0.1717	0.512452		0.734644	0.512159	-2.8	-3.64	2.373	1.186
3.22	23.7	0.0821	0.512331		0.709129	0.512192	-2.2	-5.98	0.875	1.106
1.77	14.2	0.0751	0.512381		0.708222	0.512253	-1	-5.02	0.775	1.006
3.19	17.9	0.1077	0.512465		0.708079	0.512282	-0.4	-3.37	0.895	0.963
2.31	18.8	0.0742462	0.512645		0.705842	0.512515	4.3408		0.544	0.684
3.05	25.8	0.0714332	0.512634		0.705764	0.512509	4.21627		0.555	0.695
2.38	18.1	0.0794545	0.512654		0.706128	0.512515	4.35019		0.565	0.684
2.21	15.8	0.0845192	0.512661		0.705713	0.512512	4.30788		0.579	0.688
2.04	16.9	0.0729397	0.512645		0.705782	0.512517	4.39375		0.549	0.681
2.51	21.6	0.0702167	0.512646		0.705791	0.512522	4.49769		0.538	0.672
6.46	24.3	0.1605	0.512356		0.717149	0.512073	-4.3	-5.51	2.14	1.308
5.39	22.4	0.1455	0.512337		0.689069	0.512081	-4.1	-5.87	1.697	1.287
3.11	15.7		0.512758		0.699458	0.512537	4.81		0.678807	0.648
2.49	12.3		0.512748		0.705137	0.512522	4.52		0.718361	0.671
3.4	18.2		0.512743		0.706944	0.512534	4.76		0.65213	0.652
2.41	12.7		0.512742		0.707048	0.51253	4.68		0.66673	0.658
3.36	13.6	0.149287	0.512618		0.705118	0.512354	1.25493		1.261	0.937
3.83	15.2	0.152256	0.512617		0.705718	0.512348	1.12468		1.325	0.948
3.31	13.4	0.14926	0.51267		0.707654	0.512406	2.25723		1.139	0.856
3.35	13.8	0.146685	0.512674		0.707708	0.512414	2.42031		1.087	0.842
9.02	41.2	0.1326	0.512443		0.708152		-1.6
114	56	0.1231	0.512396		0.708851		-2.2
11.3	49.3	0.1391	0.512415		0.708813		-2.4
5.56	24.1	0.1395	0.512598	14	0.7047		1.2		1.13
625	31.77	0.119	0.51237	10	0.7028		-2.5		1.25
14.19	77.47	0.1108	0.512436	5	0.7046		-0.9		1.06
3.03	14.1	0.1305	0.512424	1.2e-05	0.71012	0.51218	-1.8
1.86101	8.51672	0.132108	0.512786	6.12429e-06	0.705032	0.51254	5.23485		0.681711
8.66	39.7	0.1319	0.512297		0.720216	0.512052	-4.3	-6.65	1.586	1.397
10.3	49.1	0.1266	0.512299		0.71931	0.512063	-3	-6.61	1.487	1.387
9.29	42.7	0.1316	0.512331		0.718651	0.512086	-2.7	-6	1.519	1.36
4.12	23.8	0.1046	0.512534		0.705955	0.512341	1.3	-2.02	0.861	0.942
3.4	18.4	0.1118	0.512524		0.706142	0.512318	0.8	-2.21	0.936	0.978
4.24	20.9	0.1228	0.512502		0.705548	0.512275	0	-2.66	1.087	1.046
2.86	17.1	0.1016	0.512429	1.3e-05	0.704524	0.512227	-0.4
2.48	13.7	0.1097	0.512453	1.3e-05	0.705062	0.512235	-0.24
3.82	20.4	0.1133	0.512469	1.3e-05	0.704912	0.512244	-0.06
2.86	17.1	0.1016	0.512429		0.704524	0.512227	-0.4	-4.08	0.981	1.097
2.48	13.7	0.1097	0.512453		0.705062	0.512235	-0.2	-3.61	1.021	1.084
3.82	20.4	0.1133	0.512469		0.704912	0.512244	-0.1	-3.29	1.033	1.069
4.07	17	0.1449	0.512579		0.701327	0.512282	0.9	-1.16	1.133	0.902
2.16	10.4	0.1256	0.512534		0.704408	0.512277	0.8	-2.02	0.958	0.906
7.76	44.1	0.1063	0.512458		0.703859	0.512259	-0.2	-3.5	0.892	0.966
6.24	36.6	0.103	0.512457		0.709191	0.512263	-0.1	-3.54	0.867	0.959
3.1	21.6	0.0865	0.512314		0.70674	0.512128	-1.7	-6.32	0.927	1.125
2.85	19.5	0.0882	0.512303		0.708214	0.512113	-2	-6.54	0.953	1.149
5.19	81	0.0759	0.512286		0.710092	0.512123	-1.8	-6.87	0.886	1.132
3.4	14.8	0.1388	0.5125	4e-06	0.7065	0.5122	-0.22		1.334
3.47	16.2	0.1294	0.5125	6e-06	0.706	0.5122	0.19		1.175
3.6	16	0.1359	0.5125	8e-06	0.7067	0.5122	-0.09		1.254
3.24	16.1	0.1216	0.5125	6e-06	0.7064	0.5122	0.52		1.091
3.88	18.6	0.126	0.5125	4e-06	0.7067	0.5122	0.33		1.131
2.299	14.272	0.09744	0.51207		0.70449		-2.2		1.124
2.124	12.976	0.099	0.51207		0.70504		-2.2		1.137
2.539	15.818	0.0971	0.51205		0.70486		-2.6		1.149
2.55	15.559	0.0991	0.51204		0.70616		-2.8		1.176
2.676	13.659	0.1185	0.51221		0.70487		0.5		1.073
2.383	12.564	0.1147	0.51223		0.70278		1		1.006
2.221	11.243	0.1195	0.51222		0.70332		0.7		1.064
2.558	13.256	0.1167	0.51222		0.70605		0.8		1.035
1.82	8.875	0.124	0.51221		0.70465		0.5		1.112
0.84	6.77	0.0752	0.512319		0.705805	0.512144	-0.7	-6.22	0.914	1.165
3.19	23.3	0.0828	0.512226		0.707487	0.512034	-2.9	-8.03	1.07	1.34
1.9	15.5	0.0744	0.512383		0.707012	0.512209	0.6	-4.98	0.84	1.061
1.838	13.494	0.0824	0.51213		0.70544		-1		0.962
1.596	12.261	0.0787	0.51212		0.70527		-1.1		0.953
1.139	10.936	0.063	0.51214		0.70539		-0.9		0.881
1.47	12.599	0.0706	0.51214		0.70551		-0.8		0.903
2.42	13.3	0.1101	0.512288	4e-06	0.707001		-2.8	-6.8	1.267
2.46	14.2	0.1049	0.512285	7e-06	0.707071		-2.6	-6.9	1.21
2.59	14.8	0.1057	0.512272	6e-06	0.707005		-2.9	-7.1	1.237
2.02	9.03	0.1354	0.512437	7e-06	0.705748		-1.1	-3.9	1.386
2.18	11.9	0.1101	0.512392	5e-06	0.705832		-0.8	-4.8	1.115
2.93	13.9	0.1274	0.512458	4e-06	0.705677		-0.3	-3.5	1.22
2.23	11	0.1232	0.512443	4e-06	0.705699		-0.4	-3.8	1.191
1.85	10.7	0.1048	0.512448		0.705543	0.512198	0.6	-3.71	0.894	0.968
1.89	8.8	0.1302	0.512523		0.705851	0.512212	0.9	-2.24	1.033	0.948
2.38	15.1	0.0952	0.512535	1e-05	0.70628	0.512302	2.8
2.44	15.8	0.0932	0.512578	1.8e-05	0.70598	0.51235	3.8
4.5	20.4	0.1333	0.512574	6e-06	0.70651	0.512248	1.8
2.39	15.8	0.0916	0.512499	9e-06	0.70583	0.512275	2.3
2.71	17.5	0.0938	0.512415	8e-06	0.70591	0.512185	0.6
2.63	17.2	0.0924	0.512422	6e-06	0.70636	0.512196	0.8
5.18	28.56		0.512245			0.51195	-3.28		1.32	1.4
9.41	40.99	0.1387	0.512425	12	0.708		-1.2		1.47	1.24
10.27	59.38	0.1045	0.512463	12	0.6483		1.2		0.96	1.04
7.97	33.88	0.1423	0.512453	14	0.6965		-1.3		1.53	1.24
6.55	46.88	0.084501	0.512428	10	0.67857		1.4
7.04	31.75	0.134024	0.512283	10	0.686295		-4
6.67	33.6	0.119968	0.512346	11	0.70936		-2
2.22918	11.1568	0.120792	0.512609	4.93291e-06	0.707585	0.512291	3.33865		0.889024
6.07	37.5	0.0979	0.512253		0.706578	0.511995	-2.4	-7.51	1.18	1.344
2.95	18.5	0.0964	0.512589		0.704535	0.512335	2.7	-0.95	0.729	0.83
0.84	3.01	0.1692	0.51236		0.677955	0.511914	-4.4	-5.42	2.692	1.402
8.35	42.06	0.12	0.512313		0.70804	0.511995	-2.4		1.34
9.65	48.76	0.1196	0.512312		0.70936	0.511995	-2.4		1.34
6.15238	42.8492	0.0867949	0.512197	4.45184e-06	0.709629	0.511966	-2.89692		1.14513
6.252	31.2		0.512171		0.715213	0.511846	-5.17		1.61	1.57
5.792	29.87		0.512193		0.713875	0.511878	-4.52		1.51	1.52
6.75	28.98	0.1409	0.512492	11	0.68842		0.1	2.8	1.15	1.38
9.74	49.72	0.1185	0.512423	11	0.70369		-0.1	-4.2	1.16	1.16
6.09	24.66	0.1492	0.512468		0.69673	0.512053	-0.7		1.23
5.74	24.15	0.1437	0.51247		0.69961	0.51207	-0.4		1.2
5.74	23	0.1507	0.512459		0.69943	0.512039	-1		1.25
3.62	21.2	0.1034	0.512337	1.4e-05	0.70636	0.512053	-0.9
6.15	28.49	0.1306	0.512352	10	0.7051		-2		1.46	1.32
4.02219	18.0644	0.134602	0.512381	4.93635e-06	0.710933	0.51201	-1.67521		1.4818
4.99989	24.8018	0.121865	0.512259	5.18193e-06	0.712209	0.511923	-3.37181		1.47844
2.95	14.3	0.1242	0.51232		0.707095	0.511988	-2.4	-6.21	1.316	1.257
3.16	72.1	0.1551	0.512346		0.707249	0.511932	-3.5	-5.69	1.961	1.358
4.53	34.78	0.07883	0.512275	9	0.706321		-0.8
1.116	5.471	0.1234	0.512427	1.5e-05	0.705517	0.512077	-0.04		1.219	1.175
1.188	4.499	0.1599	0.512563	1e-05	0.705595	0.512108	0.58		1.66	1.122
1.713	9.525	0.1089	0.512441	8e-06	0.705846	0.512132	1.03		1.031	1.088
3.876	22.9	0.10233	0.51236	4e-06	0.706196		-0.2		1.089	1.191
3.70634	19.3383	0.115862	0.512382	4.5719e-06	0.706841	0.512051	-0.490399		1.19715
4.299	22.72	0.114384	0.512329	4e-06	0.706162		-1.5		1.271	1.295
6.201	32.15	0.116592	0.512406	3e-06	0.705937		-0.1		1.178	1.182
3.64	20.72	0.106144	0.51225	11	0.704484		-2.7
10.68	54.94	0.11755	0.512409	9	0.65591		-0.3
7.352	37.43	0.118737	0.512403	5e-06	0.706194		-0.2		1.211
4.3	23.67	0.109955	0.512266	10	0.706495		-2.5
4.48499	21.5966	0.125537	0.512216	5.70677e-06	0.709828	0.511845	-4.13244		1.61372
0.18	1.37	0.0785	0.512401	1.3e-05	0.7033	0.512125	3.48
2.65	17.9	0.0892	0.51069	8e-06	0.710965	0.509135	-1.26	-38	2.99	3.06
1.73	9.35	0.1119	0.511235	5e-06	0.709421	0.509236	0.72	-27.4	2.85	2.84
1.74	12.5	0.0847	0.510594	1.7e-05	0.707807	0.509076	1.99	-39.9	3	3.06
		0.135	0.512311		0.7223		-4.24		1.386
11.1	41.5	0.1616	0.512707	1.9e-05	0.70663	0.512412	2.6
11.6	43	0.1627	0.512793	2.2e-05	0.70655	0.512496	4.3
11.3	41.4	0.1657	0.512763	5e-06	0.70644	0.51246	3.5
10	37.1	0.1633	0.51273	1e-05	0.70658	0.512432	3
		0.124	0.51235		0.7108		-2.92		1.294
		0.127	0.512379		0.7068		-2.46		1.256
		0.13	0.512317		0.713		-3.79		1.365
		0.121	0.51239		0.7022		-2		1.22
		0.124	0.512405				-1.81		1.207
		0.123	0.512402		0.7077		-1.81		1.207
7.49	34.2	0.1325	0.512325	10	0.7108		-3.1		1.55
5.36	23.7	0.137	0.512331	14	0.7099		-3.2		1.62
8.97	42.5	0.1278	0.512344	14	0.7069		-2.5		1.43
9.21	43.6	0.1278	0.512285	6	0.7036		-3.6		1.53
9.74	46.3	0.1274	0.512329	15	0.7074		-2.8		1.45
4.745	21.05	0.1365	0.512758	1e-05	0.704582	0.512387	5.53		0.775
4.338	19.12	0.1373	0.512725	1.1e-05	0.705196	0.512351	4.84		0.85
4.347	19.23	0.1368	0.512735	1e-05	0.704327	0.512364	5.08		0.823
4.29	20.49	0.1265	0.512721	1e-05	0.705845	0.512372	5.39		0.751
4.07	19.1	0.1288	0.512704	7e-06	0.705098	0.512343	5.01		0.801
4.02	18.6	0.1307	0.512712	6e-06	0.70487	0.512345	5.05		0.805
5.76	26.4	0.1319	0.512711	1e-05	0.704217	0.512338	4.99		0.819
5.02	29.3	0.1038	0.512482	9e-06	0.70786	0.512183	2.2
83.29	519.3	0.1	0.51	11	0.708745		-1.91
91.99	720.5	0.08	0.51	10	0.708617		-2.66
96.24	748.6	0.08	0.51	10	0.708626		-3.67
0.78	3.42	0.14	0.51	10	0.708279		-2.95
0.26	0.99	0.16	0.51	10	0.708892		-1.66
5.61	22.1	0.1359	0.512351	1.5e-05	0.70799	0.512101	-3.41
5.71	22.4	0.1276	0.51241	1.4e-05	0.706781	0.512175	-1.97
5.18	19.71	0.1405	0.5125	1e-05	0.707781	0.512241	-0.68
4.6	18.53	0.1283	0.512463	1.1e-05	0.706739	0.512227	-0.96
5.76	23.13	0.1385	0.512497	1.2e-05	0.707119	0.512242	-0.66
3.95	15.1	0.1651	0.512841		0.705064		5.1
2.35	8.52	0.167	0.512804		0.705926		4.3
3.99	14.9	0.161811	0.512646		0.706436	0.512358	1.36476		1.484	0.93
4.01	17.1	0.1417	0.512635		0.706691	0.512383	1.84381		1.094	0.891
3.59	13.7	0.158341	0.512643		0.706112	0.512362	1.4369		1.396	0.924
4.15	17.1	0.146647	0.51263		0.706285	0.512369	1.57419		1.186	0.912
5.02	16.47	0.1843	0.512958	1.3e-05	0.709825	0.51262	6.7
3.87	12.35	0.1893	0.51301	1.3e-05	0.708813	0.512663	7.5
5.24	17.8	0.1778	0.512957	1.3e-05	0.705653	0.512631	6.9
4.15	13.58	0.1846	0.51301	1.4e-05	0.70335	0.512672	7.7
2.68	7.74	0.2094	0.513126	8e-06	0.704141	0.512756	9.1
2.53	7.75	0.1976	0.5131	7e-06	0.703622	0.512751	9
5.02	16.4	0.1853	0.512976	8e-06	0.704825	0.512648	7
3.84	11.8	0.1975	0.513007	9e-06	0.705581	0.512658	7.2
4.68	14.5	0.1948	0.513006	8e-06	0.705567	0.512662	7.2
9.62	32	0.1818	0.512909	8e-06	0.712714	0.512588	5.8
5.14	16	0.1943	0.513012	7e-06	0.703726	0.512668	7.4
9.48	29.8	0.1937	0.512964		0.707183		6.47
8.95	28.4	0.1918	0.512971		0.707546		6.67
9.17	29.2	0.1913	0.512975		0.707626		6.78
6.62	21.1	0.1907	0.512966		0.70624		6.62
10.5	33.4	0.1908	0.512954		0.706994		6.39
3.99	18.83	0.13	0.51	11	0.705931		-1.66
2.64	10.18	0.16	0.51	10	0.705968		1.49
0.53	1.37	0.24	0.51	11	0.702858		9.66
0.47	1.02	0.28	0.51	11	0.703926		8.98
0.58	1.44	0.24	0.51	12	0.702977		9.21
4.49	13.58	0.2	0.51	13	0.705091		5.02
1.01	2.6	0.23	0.51	13	0.703935		7.47
1.03	2.47	0.25	0.51	11	0.703389		7.64
			0.513519		0.7052	0.512568	7.28
			0.513431		0.70425	0.512457	5.12
			0.51338		0.70711	0.512392	3.85
			0.513264		0.70429	0.512467	5.31
			0.513366		0.70418	0.5125	5.95
			0.51341		0.70445	0.512431	4.61
			0.5134		0.70421	0.512486	5.68
1.91	6.31	0.1829	0.5128	5e-06	0.7048	0.5124	3.81		1.697
1.57	5.5	0.1725	0.5128	5e-06	0.7049	0.5124	4.3		1.291
1.33	5.62	0.143	0.5127	6e-06	0.7049	0.5124	3.72		0.964
8.77	41.67	0.1273	0.512466	5	0.68786		0.3	3.4	1.13	1.21
6.61	32.49	0.122992	0.512431	9e-06	0.705892		0.1		1.221
0.11	0.37	0.17	0.512866	8e-06	0.7052		6.1
2.31	5.011	0.28	0.513277	7e-06	0.7039		8.2
1.01	3.06	0.2	0.513017	9e-06	0.7051		7.2
0.46	1.39	0.2	0.513094	1e-05	0.7046		8.5
0. 06	0.54	0.071	0.512139	2e-05	0.70421	0.51189	-1.12
0.03	0.15	0.1308	0.51181	5e-05	0.71251	0.511351	-11.65
0.03	0.14	0.145	0.511833	4.5e-05	0.71056	0.511324	-12.18
0.55	2.81	0.1181	0.512686	1.8e-05	0.7036	0.512271	6.33
0.07	0.2	0.197	0.512368	5e-05	0.71094	0.511676	-5.29
0.17	0.46	0.2299	0.512731	2.1e-05	0.70619	0.511924	-0.46
0.03	0.13	0. 135 4	0.511969	9.3e-05	0.71019	0.511494	-8.86
4.19	15.41	0.1648	0.512487	1.6e-05			-1	-2.9
2.98	10.22	0.1763	0.512572	1.4e-05			-0.1	-1.3
10.15	31.07	0.1978	0.512968	1.2e-05			6.4	6.4
10.64	32.69	0.1969	0.512962	1.3e-05			6.3	6.3
2.47	8.98	0.1663	0.512461	9e-06			-1.6	-3.5
3.36	11.92	0.1702	0.512483	1.3e-05			-1.4	-3
5.07	22.02	0.1391	0.512411	1.2e-05			-1	-4.4
2.38	7.7	0.190049	0.512587		0.718379	0.511479	-0.2		1.567
2.05	5.08	0.248124	0.512599		0.705595	0.511152	-6.6		2.094
3.31	10.5	0.194756	0.512335		0.707139	0.511199	-5.7		2.011
2.3	4.78	0.295855	0.51269		0.71043	0.510965	-10.3		2.391
3.09	10.5	0.180601	0.512325		0.7088	0.511272	-4.3		1.898
2.36	8.74	0.166027	0.512052		0.707573	0.511084	-8		2.2
6.89	38.5	0.110037	0.511666		0.714914	0.51067	-3.7		2.258
3.99	12.59	0.1917	0.513091	1.3e-05	0.703662	0.512739	9
3.51	10.6	0.2003	0.513096	1.2e-05	0.703717	0.512729	8.8
37.55	116.5	0.1948	0.513072	1e-05	0.703944	0.512715	8.5
4.46	13.72	0.1965	0.513017	1.3e-05	0.703906	0.512657	7.4
5.23	17.17	0.1839	0.512992	1.3e-05		0.512655	7.4
5.03	16.6	0.1831	0.513002	1.1e-05	0.704212	0.512666	7.6
5.76	18.49	0.1882	0.512994	1.1e-05	0.703849	0.51265	7.3
8.43	28.18	0.1808	0.512999	1.3e-05	0.704235	0.512668	7.6
35.38	183.1	0.1168	0.512988	1.3e-05	0.70374	0.512655	7.4
7.68	26.1	0.178	0.512954	1.4e-05	0.70429	0.512628	6.8
7.79	26.51	0.1775	0.512939	1.3e-05	0.704044	0.512613	6.6
8.31	28.68	0.1751	0.512959	1.3e-05	0.704327	0.512638	7
10.4	39.6	0.1598	0.512938	1.1e-05	0.703774	0.512644	7.09
10.5	39.2	0.1617	0.512945	1e-05	0.705322	0.512648	7.16
9.2	34.7	0.1608	0.51295	1.2e-05	0.703854	0.512654	7.28
9.52	35.9	0.1605	0.512949	1.1e-05	0.703996	0.512654	7.27
10.3	38.8	0.1605	0.512817	1.3e-05	0.703822	0.512521	4.69
3.56	11.58	0.19	0.51	11	0.703542		8.85
4.35	15.37	0.17	0.51	11	0.703365		7.08
4.24	12.79	0.2	0.51	13	0.703818		9.04
4.09	12.73	0.19	0.51	13	0.703999		8.4
3.68	10.93	0.2	0.51	11	0.704057		9.24
3.71	11.25	0.2	0.51	17	0.704039		8.42
3.86	11.79	0.2	0.51	14	0.703879		9.01
3.92	11.92	0.2	0.51	12	0.703926		9.41
3.81	11.63	0.2	0.51	12	0.706203		9.06
7.64	24.4	0.19	0.51	14	0.70455		6.44
7.51	24	0.19	0.51	12	0.704365		6.75
4.77	14.94	0.19	0.51	14	0.704132		7.05
5.22	17.88	0.18	0.51	13	0.705001		6.72
5.18	17.8	0.18	0.51	13	0.704683		6.31
5.21	17.99	0.18	0.51	14	0.704838		6.43
8.46	28.38	0.18	0.51	14	0.704314		6.21
7.04	24.02	0.18	0.51	13	0.704351		6.62
7.61	25.07	0.18	0.51	14	0.704228		6.58
4.65	14.64	0.19	0.51	14	0.704749		5.72
5.38	17.44	0.19	0.51	12	0.705129		5.87
5.75	18.88	0.18	0.51	14	0.70548		5.14
5.32	18.24	0.18	0.51	11	0.704492		6.86
4.9	18.6		0.512886	9e-06	0.705854		6.2
5.2	40.5		0.512922	2e-06	0.70628		10
4.9	19		0.512697	4e-06	0.70631		2.7
5.9	22.2		0.512629	3e-06	0.707285		1.2
1.65	6.32	0.1578	0.512825	5e-06	0.705015	0.5124	5.69		0.888
1.42	5.07	0.1693	0.512795	6e-06	0.704879	0.512339	4.51		1.218
2.06	9.39	0.1326	0.512768	5e-06	0.705088	0.512411	5.9		0.719
5.76	26.4	0.1319	0.512223	6e-06	0.711291	0.511848	-4.5		1.722
6.38	30.5	0.1264	0.512177	7e-06	0.711235	0.511818	-5.09		1.695
6.24	28.5	0.1324	0.512161	9e-06	0.711309	0.511784	-5.75		1.849
5.95	30.8	0.1169	0.512462	7e-06	0.70616	0.512117	1.2
5.59	26.8	0.1261	0.512478	5e-06	0.70691	0.512106	0.9
4.17	21.4	0.1181	0.512524	1.3e-05	0.70556	0.512176	2.3
1.45	5.36	0.1629	0.512975	6e-06	0.70292	0.512403	8.9
0.35	1.26	0.167	0.512823	2.3e-05	0.70361	0.512237	5.65
*References listed in the Table S3.
